# Supplementary material
Source: PubMed Central journal article supplement (PMC8439599)
Supplement: jci-131-147598-s148.pdf [file jci-131-147598-s148.pdf]

*Supplementary Materials*

**Somatic reversion impacts myelodysplastic syndromes and acute myeloid leukemia evolution in the short telomere disorders**

Kristen E. Schratz<sup>1,2,3</sup>, Valeriya Gaysinskaya<sup>1</sup>, Zoe L. Cosner<sup>1</sup>, Emily A. DeBoy<sup>1,4</sup>, Zhimin Xiang<sup>1</sup>, Laura Kasch-Semenza<sup>4</sup>, Liliana Florea<sup>4,5</sup>, Pali D. Shah<sup>5</sup>, Mary Armanios<sup>1,2,3,4,6</sup>

<sup>1</sup>Department of Oncology, <sup>2</sup>Telomere Center at Johns Hopkins, <sup>3</sup>Sidney Kimmel Comprehensive Cancer Center, <sup>4</sup>Department of Genetic Medicine, <sup>5</sup>Department of Medicine and <sup>6</sup>Department of Molecular Biology and Genetics, Johns Hopkins University School of Medicine, Baltimore, Maryland, USA

## Supplementary Figure 1

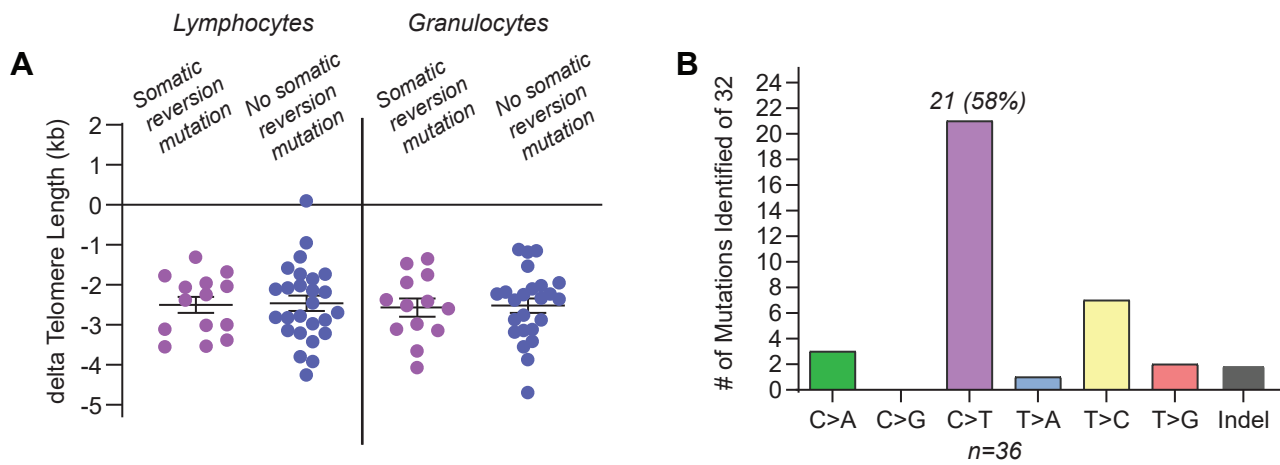

**Mutation types detected and their clone size and effect on telomere length. A.** Comparison of telomere length graphed as the difference from the age-adjusted 50th percentile in lymphocytes and granulocytes. Data are stratified by the presence or absence of a somatic reversion telomere-related mutation. The mean is shown and error bars refer to standard error of the mean. **A.** Mutation types identified in cohorts (controls, short telomere and short telomere with MDS/AML).

**Supplementary Table 1. Genes and regions (n=17) targeted for Haloplex sequencing**

| Gene Name                             | NM_ID/Coordinates        |
|---------------------------------------|--------------------------|
| <u>Telomerase Core Promoters</u>      |                          |
| <i>TERT promoter</i>                  | chr5:1295085-1295385     |
| <i>TR promoter and TR gene</i>        | chr3:169482378-169483348 |
| <u>Shelterin</u>                      |                          |
| <i>POT1</i>                           | NM_015450                |
| <i>TINF2</i>                          | NM_001099274             |
| <i>TERF2IP</i>                        | NM_018975                |
| <i>ACD/TPP1</i>                       | NM_001082486             |
| <i>TERF1</i>                          | NM_017489                |
| <i>TERF2</i>                          | NM_005652                |
| <u>RNA Exosome and RNA Processing</u> |                          |
| <i>MTREX/SKIV2L2</i>                  | NM_015360                |
| <i>RBM7</i>                           | NM_001286045             |
| <i>DIS3</i>                           | NM_014953                |
| <i>PAPBN1</i>                         | NM_004643                |
| <i>TENT4B/PAPD5</i>                   | NM_001040284             |
| <i>ZC3H18</i>                         | NM_001294340             |
| <u>ALT</u>                            |                          |
| <i>ATRX</i>                           | NM_000489                |
| <i>DAXX</i>                           | NM_001141970             |
| <u>Cell Cycle Checkpoint</u>          |                          |
| <i>TP53</i>                           | NM_000546                |

**Supplementary Table 2. Germline mutations in telomere or telomerase genes not previously reported\***

| Mutant Gene | Coding Variant                              | Protein               | Prior report                  |
|-------------|---------------------------------------------|-----------------------|-------------------------------|
| <i>DKC1</i> | c.942G>A                                    | p.Lys314Lys           | Gaysinskaya 2020 <sup>1</sup> |
|             | c.915+10G>A**                               | -                     | -                             |
| <i>NAF1</i> | c.950A>T                                    | p.Asp317Val           | -                             |
| <i>PARN</i> | c.543_544insTT                              | p.Asp182Leufs*5       | -                             |
|             | NC_000016.9:g.(?_14725823)_ (14643928_?)del | Exon 1-21 deletion*** | Feurstein 2020 <sup>2</sup>   |
|             | c.(?_-135_(c.1480+1_1481-1)del              | Exon 1-21 deletion*** | -                             |
| <i>TERT</i> | c.345C>G                                    | p.Phe115Leu           | -                             |

\*Remaining mutations have been reported in Alder *et al.* 2018 and Schratz *et al.* 2020<sup>3,4</sup>.

\*\*This mutation was identified in association with a more common *RTEL1* variant of unknown significance but because of rarity, was felt to be the more likely culprit.

\*\*\*These two individuals shared a deletion of the *PARN* exons but it is unclear whether they shared the same breakpoints.

**Supplementary Table 3. Somatic Mutations by Ultra-Deep Targeted Sequencing\***

| Disease        |       |           |           |           |         |             |                |                 |                   |       |              | Total Read |           |        |  |
|----------------|-------|-----------|-----------|-----------|---------|-------------|----------------|-----------------|-------------------|-------|--------------|------------|-----------|--------|--|
| Classification | Chr   | Start     | Stop      | Reference | Variant | Gene Symbol | Mutation Type  | Coding Position | Amino Acid Change | Count | Unique Count | Ref Count  | Var Count | VAF    |  |
| MDS-free       | chr5  | 1295228   | 1295228   | G         | A       | TERT        | 3_prime_UTR    | c.-124 C>T      | NULL              | 784   | 146          | 144        | 2         | 0.0137 |  |
| MDS-free       | chr5  | 1295228   | 1295228   | G         | A       | TERT        | 3_prime_UTR    | c.-124 C>T      | NULL              | 892   | 124          | 122        | 2         | 0.0161 |  |
| MDS-free       | chr5  | 1295228   | 1295228   | G         | A       | TERT        | 3_prime_UTR    | c.-124 C>T      | NULL              | 513   | 72           | 70         | 2         | 0.0278 |  |
| MDS-free       | chr5  | 1295228   | 1295228   | G         | A       | TERT        | 3_prime_UTR    | c.-124 C>T      | NULL              | 524   | 62           | 58         | 4         | 0.0645 |  |
| MDS-free       | chr5  | 1295228   | 1295228   | G         | T       | TERT        | 3_prime_UTR    | c.-124 C>A      | NULL              | 230   | 21           | 16         | 5         | 0.2381 |  |
| MDS-free       | chr5  | 1295228   | 1295228   | G         | A       | TERT        | 3_prime_UTR    | c.-124 C>T      | NULL              | 720   | 108          | 80         | 28        | 0.2593 |  |
| MDS-free       | chr5  | 1295228   | 1295228   | G         | A       | TERT        | 3_prime_UTR    | c.-124 C>T      | NULL              | 203   | 26           | 14         | 12        | 0.4615 |  |
| MDS-free       | chr5  | 1295228   | 1295228   | G         | A       | TERT        | 3_prime_UTR    | c.-124 C>T      | NULL              | 778   | 68           | 30         | 38        | 0.5588 |  |
| MDS-free       | chr5  | 1295250   | 1295250   | G         | A       | TERT        | 3_prime_UTR    | c.-146 C>T      | NULL              | 209   | 26           | 24         | 2         | 0.0769 |  |
| MDS-free       | chr5  | 1295250   | 1295250   | G         | A       | TERT        | 3_prime_UTR    | c.-146 C>T      | NULL              | 1370  | 252          | 102        | 150       | 0.5952 |  |
| MDS-free       | chr5  | 54640968  | 54640968  | G         | A       | MTREX       | missense       | c.G1052A        | p.R351Q           | 13287 | 823          | 817        | 6         | 0.0073 |  |
| MDS-free       | chr5  | 54701332  | 54701332  | G         | A       | MTREX       | missense       | c.G2561A        | p.R854H           | 46701 | 891          | 885        | 6         | 0.0067 |  |
| MDS-free       | chr7  | 124464108 | 124464108 | A         | T       | POT1        | missense       | c.T1813A        | p.C605S           | 12812 | 952          | 943        | 9         | 0.0095 |  |
| MDS-free       | chr7  | 124493099 | 124493099 | G         | A       | POT1        | missense       | c.C796T         | p.H266Y           | 1172  | 181          | 170        | 11        | 0.0608 |  |
| MDS-free       | chr7  | 124503475 | 124503475 | T         | C       | POT1        | missense       | c.A475G         | p.M159V           | 1885  | 213          | 182        | 31        | 0.1455 |  |
| MDS-free       | chr7  | 124511096 | 124511096 | C         | T       | POT1        | splicing       | c.125-1G>A      | NULL              | 4541  | 299          | 284        | 15        | 0.0502 |  |
| MDS-free       | chr7  | 124532323 | 124532323 | T         | C       | POT1        | missense       | c.A121G         | p.T41A            | 2280  | 120          | 104        | 16        | 0.1333 |  |
| MDS-free       | chr7  | 124532347 | 124532347 | T         | C       | POT1        | missense       | c.A97G          | p.K33E            | 35810 | 1437         | 1423       | 14        | 0.0097 |  |
| MDS-free       | chr11 | 114278186 | 114278186 | A         | -       | RBM7        | frameshift_del | c.461delA       | p.Met155Cysfs*49  | 6770  | 754          | 735        | 18        | 0.0239 |  |
| MDS-free       | chr13 | 73345938  | 73345938  | C         | T       | DIS3        | missense       | c.G1600A        | p.E534K           | 46204 | 900          | 697        | 203       | 0.2256 |  |
| MDS-free       | chr13 | 73346338  | 73346338  | C         | T       | DIS3        | missense       | c.G1462A        | p.D488N           | 3728  | 160          | 121        | 39        | 0.2438 |  |
| MDS-free       | chr16 | 75690321  | 75690321  | A         | C       | TERF2IP     | missense       | c.A1012C        | p.K338Q           | 11127 | 940          | 927        | 13        | 0.0138 |  |
| MDS-free       | chr17 | 7572948   | 7572952   | TGTCT     | -       | TP53        | frameshift_del | c.1157_1161del  | p.Lys386Cysfs*4   | 1964  | 144          | 113        | 30        | 0.2083 |  |
| MDS/AML        | chr17 | 7576897   | 7576897   | G         | A       | TP53        | nonsense       | c.C949T         | p.Q317X           | 10226 | 302          | 282        | 20        | 0.0662 |  |
| MDS/AML        | chr17 | 7577022   | 7577022   | G         | A       | TP53        | nonsense       | c.C916T         | p.R306X           | 18247 | 2283         | 355        | 1928      | 0.8445 |  |
| MDS-free       | chr17 | 7577094   | 7577094   | G         | A       | TP53        | missense       | c.C844T         | p.R282W           | 41925 | 3685         | 3542       | 143       | 0.0388 |  |
| MDS-free       | chr17 | 7577144   | 7577144   | A         | G       | TP53        | missense       | c.T794C         | p.L265P           | 13653 | 1893         | 1801       | 92        | 0.0486 |  |
| MDS-free       | chr17 | 7577517   | 7577517   | A         | C       | TP53        | missense       | c.T764G         | p.I255S           | 20001 | 1237         | 1229       | 8         | 0.0065 |  |
| MDS-free       | chr17 | 7577548   | 7577548   | C         | T       | TP53        | missense       | c.G733A         | p.G245S           | 15979 | 2877         | 2711       | 166       | 0.0577 |  |
| Control        | chr17 | 7577568   | 7577568   | C         | T       | TP53        | missense       | c.G713A         | p.C238Y           | 36554 | 2634         | 2608       | 26        | 0.0099 |  |
| MDS/AML        | chr17 | 7578190   | 7578190   | T         | C       | TP53        | missense       | c.A659G         | p.Y220C           | 15861 | 2318         | 2195       | 123       | 0.0531 |  |
| MDS/AML        | chr17 | 7578419   | 7578419   | C         | A       | TP53        | nonsense       | c.G511T         | p.E171X           | 38047 | 4459         | 4304       | 155       | 0.0348 |  |

\*Includes variants detected by Haloplex custom-designed platform. Additional variants (n = 4) were identified using a clinically validated platform with overall unique mean coverage 443x.

## Supplementary References

1. Gaysinskaya V, Stanley SE, Adam S, and Armanios M. Synonymous Mutation in DKC1 Causes Telomerase RNA Insufficiency Manifesting as Familial Pulmonary Fibrosis. *Chest*. 2020;Dec(158(6)):2449-57.
2. Feurstein S, Adegunsoye A, Mojsilovic D, Vij R, West DePersia AH, Rajagopal PS, Osman A, Collins RH, Kim RH, Gore SD, Greenberg P, Godley LA, Li Z, Del Gaudio D, Subramanian HP, Das S, Walsh T, Gulsuner S, Segal JP, Husain AN, Gurbuxani S, King MC, Streck ME, and Churpek JE. Telomere biology disorder prevalence and phenotypes in adults with familial hematologic and/or pulmonary presentations. *Blood Adv*. 2020;4(19):4873-86.
3. Alder JK, Hanumanthu VS, Strong MA, DeZern AE, Stanley SE, Takemoto CM, Danilova L, Applegate CD, Bolton SG, Mohr DW, Brodsky RA, Casella JF, Greider CW, Jackson JB, and Armanios M. Diagnostic utility of telomere length testing in a hospital-based setting. *Proc Natl Acad Sci U S A*. 2018;115(10):E2358-e65.
4. Schratz KE, Haley L, Danoff SK, Blackford A, DeZern A, Gocke CD, Duffield AS, and Armanios M. Cancer spectrum and outcomes in the Mendelian short telomere syndromes. *Blood*. 2020;May 28 135(22):1946-56.
